# Supplementary material for: “The elephant in the room;” a qualitative study of perinatal fears in opioid use disorder treatment in Southern Appalachia
Source: PubMed Central journal article supplement (PMC7890815; doi:10.1186/s12884-021-03596-w), 2021-02-17
Supplement: 12884_2021_3596_MOESM1_ESM.pdf [file 12884_2021_3596_MOESM1_ESM.pdf]

Verbally consented to participate?

Pseudonym?

To be recorded?

Attends group visits?

### PRENATAL

- 1) **How did you find out about** [the combined perinatal and substance use treatment clinic]?
- 2) **What has** [coming to the clinic] **been like for you?**
- 3) a. **Is there anything you specifically appreciate about** [the combined perinatal and substance use treatment clinic]? (*Probe/prompt - What about the program, works for you?*)  
b. **Is there anything that is particularly hard about** [the combined perinatal and substance use treatment clinic] **about the program?** (*Probe/prompt - Are there any barriers to substance use treatment during pregnancy, for you?*)
- 4) (*If participates in prenatal group visits*) – **What are group visits like for you?** How do they fit into your overall treatment and prenatal care?
- 5) Is there **anything that would be helpful to you in your care that is not part of** [the combined perinatal and substance use treatment clinic] so far?  
(*Probe/prompt -- Specific services you'd want to be to connected to?*)
- 6) What are your **goals for combined substance use treatment/prenatal care?** Do you feel [the combined perinatal and substance use treatment clinic] **is helping** [you achieve those goals]?  
(*Clarify - How so?/Why or why not?*)
- 7) **Anything else you want to tell me** about your experiences with substance use treatment and prenatal care?

### POST-PARTUM

**All relevant questions from above if not interviewed prenatally (but past tense if re: pregnancy)**  
and

- Any **services you feel would be helpful now that are not part of** [the combined perinatal and substance use treatment clinic]?  
(*Probe/prompt -- Postpartum services you'd want to be to connected to?*)
- Please tell me about your **birth/delivery experience**  
(*start open-ended; check off items below if mentioned or probe if not mentioned and if seems appropriate*)
  - *Where was baby born?*
  - *How treated in different areas of the hospital? (How would you like to have been treated?)*
  - *Anything you would have liked to have been different? (delivery, or right after baby was born?)*
- Did [the combined perinatal and substance use treatment clinic] **prepare you enough for what would happen at the hospital?**  
(*Clarify -- How so, or not?*)
- **Anything else you want to tell me** about your experiences with substance use treatment, and pregnancy and birthing care?
